# Supplementary material for: The m assive d ifferences in d iet i nduced an a ltered g ut m icrobiota s tructure in m andarin d uck ( Aix g alericulata ) at b reeding a rea
Source: Research Square preprint supplement (doi:10.21203/rs.3.rs-1413730/v1), 2022-03-09
Supplement: Supplementary file 1 [file 6dabc722d75081acb7a24c11.docx]

Table S1

| Group | Order | Family | Genus |
| --- | --- | --- | --- |
| A | Poales | Cyperaceae | *Scirpoides* |
| *Carex* |
| Poaceae | *Elymus* |
| *Leersia* |
| *Gastridium* |
| *Poa* |
| *Styppeiochloa* |
| *Arrhenatherum* |
| *Brachypodium* |
| *Miscanthus* |
| *Chikusichloa* |
| Fagales | Juglandaceae | *Platycarya* |
| Fagaceae | *Lithocarpus* |
| *Quercus* |
| Betulaceae | *Betula* |
| *Corylus* |
| Fabales | Fabaceae | *Arachis* |
| *Senna* |
| B | Poales | Cyperaceae | *Scirpoides* |
| *Carex* |
| Poaceae | *Poa* |
| *Leersia* |
| *Gastridium* |
| *Elymus* |
| *Miscanthus* |
| *Brachypodium* |
| *Chikusichloa* |
| *Isachne* |
| *Paspalum* |
| *Arrhenatherum* |
| Caryophyllales | Polygonaceae | *Persicaria* |
| *Polygonum* |
| *Fagopyrum* |
| Caryophyllaceae | *Cerastium* |
| *Stellaria* |
| Saxifragales | Hamamelidaceae | *Parrotia* |
| Altingiaceae | *Altingia* |
| Crassulaceae | *Hylotelephium* |
| *Kalanchoe* |
| Lamiales | Orobanchaceae | *Agalinis* |
| Lamiaceae | *Perilla* |
| Plantaginaceae | *Scoparia* |
| *Linaria* |
| *Chaenorhinum* |
| *Plantago* |
| Asparagales | Asphodelaceae | *Bulbine* |
| Iridaceae | *Gladiolus* |
| Fagales | Juglandaceae | *Platycarya* |
| Fagaceae | *Lithocarpus* |
| *Quercus* |
| Betulaceae | *Betula*  *Carpinus*  *Corylus* |
| Myricaceae | *Morella* |
| Rosales | Urticaceae | *Oreocnide* |
| *Pilea* |
| Rosaceae | *Rosaceae* |
| Rhamnaceae | *Ventia*  *Ziziphus* |
| Cucurbitales | Cucurbitaceae | *Citrullus* |
| Brassicales | Brassicaceae | *Barbarea* |
| *Malcolmia* |
| Resedaceae | *Oligomeris* |
